# Supplementary material for: In Which Way Do the Flower Properties of the Specialist Orchid Goodyera repens Meet the Requirements of Its Generalist Pollinators?
Source: MDPI journal article supplement (doi:10.3390/ijms24108602), 2023-05-11

# In Which Way Do the Flower Properties of the Specialist Orchid *Goodyera repens* Meet the Requirements of Its Generalist Pollinators?

Emilia Brzosko \*, Andrzej Bajguz \*, Justyna Burzyńska and Magdalena Chmur

Department of Biology and Plant Ecology, Faculty of Biology, University of Białystok, Ciołkowskiego 1J, 15-245 Białystok, Poland; j.burzynska@uwb.edu.pl (J.B.); m.chmur@uwb.edu.pl (M.C.)

\*Correspondence: emilka@uwb.edu.pl (E.B.); abajguz@uwb.edu.pl (A.B.)

**Figure S1.** Correlation heatmap for reproductive success (that is, pollinaria removal, PR, and female re-productive success, FRS), floral display (that is, SH, IL, and NF), flower structures (that is, FL, FW, LL, WL, and LH), and nectar composition (that is, sugars and amino acids) of *Goodyera repens* populations. Significant positive correlations are colored blue, while negative correlations are colored red ( $p < 0.05$ ). Insignificant correlations are omitted. A. The colored and labeled scale codes show the value of the Spearman rank correlation coefficient ( $r_s$ ). The abbreviations are explained in Tables 1 and 3.

BIA1

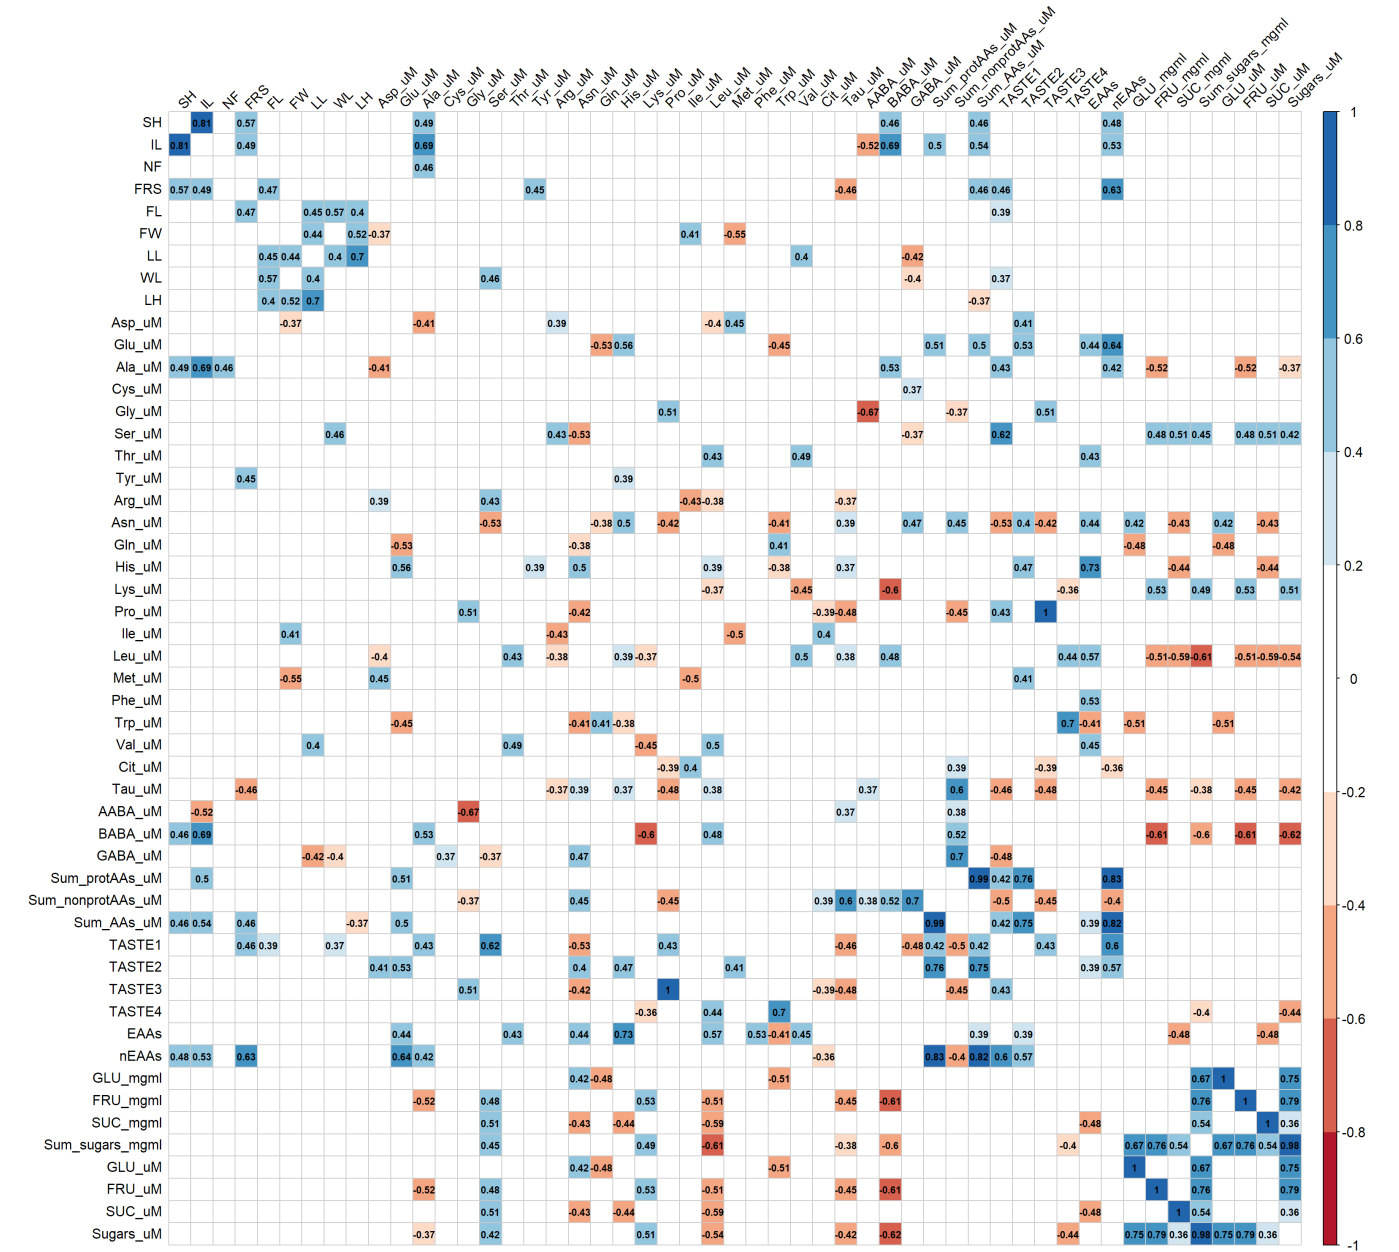

## BIA2

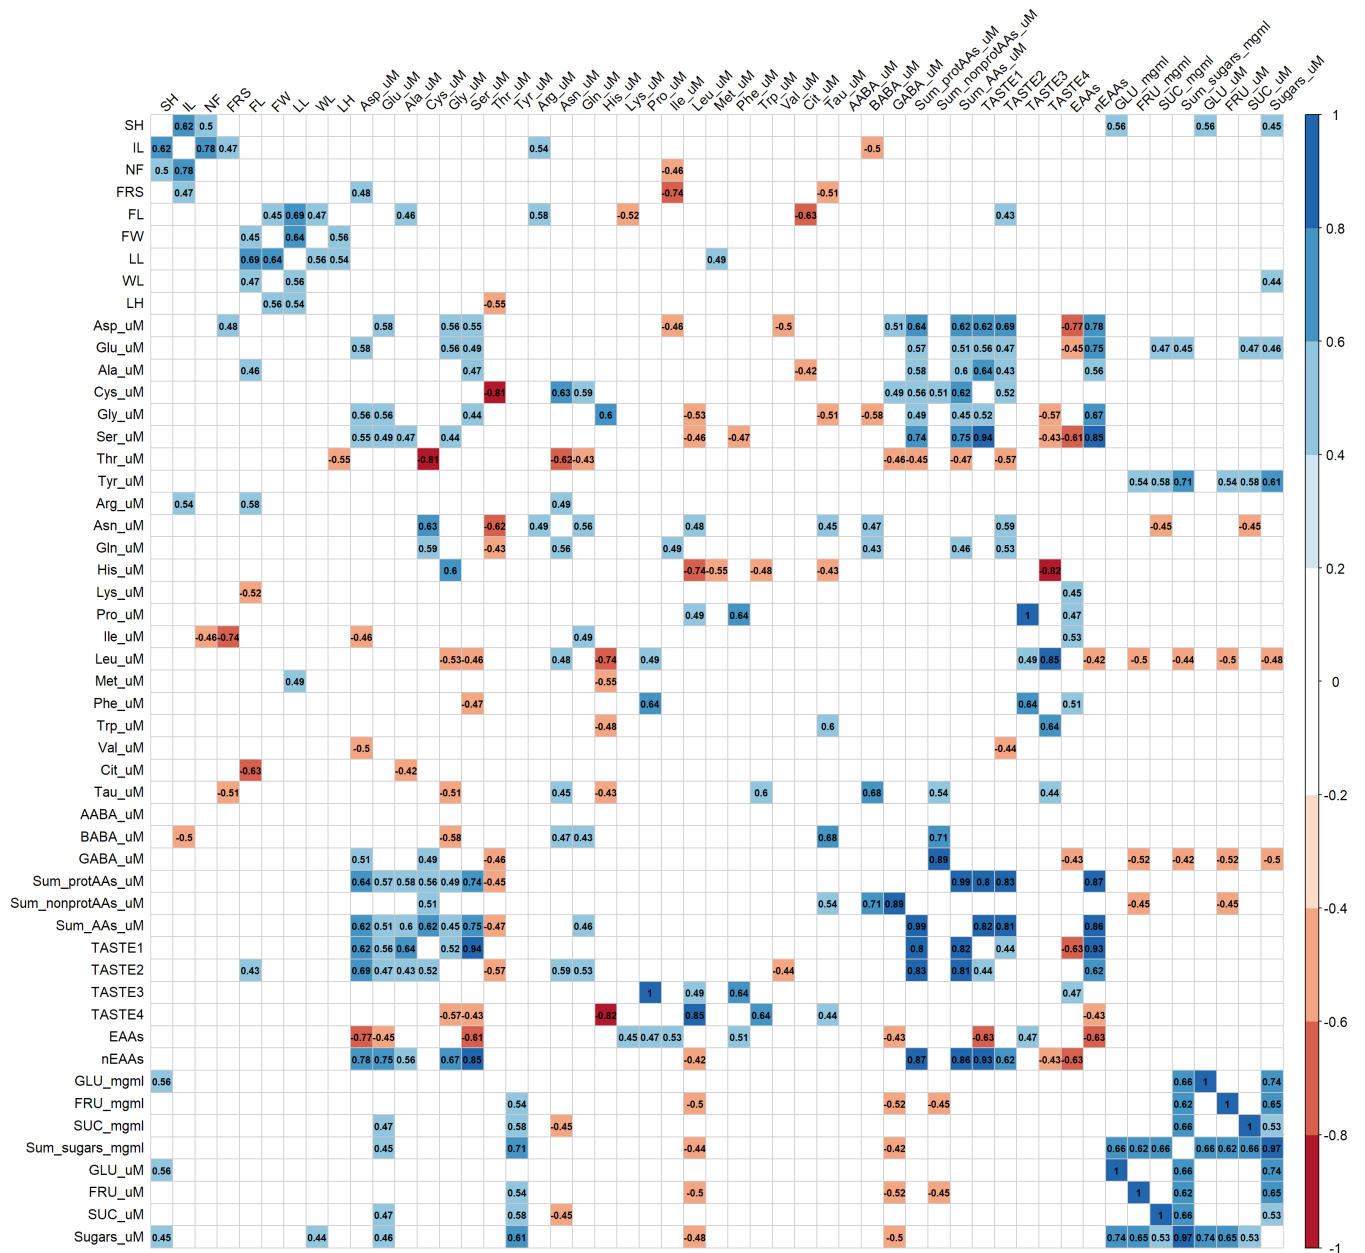

FORT

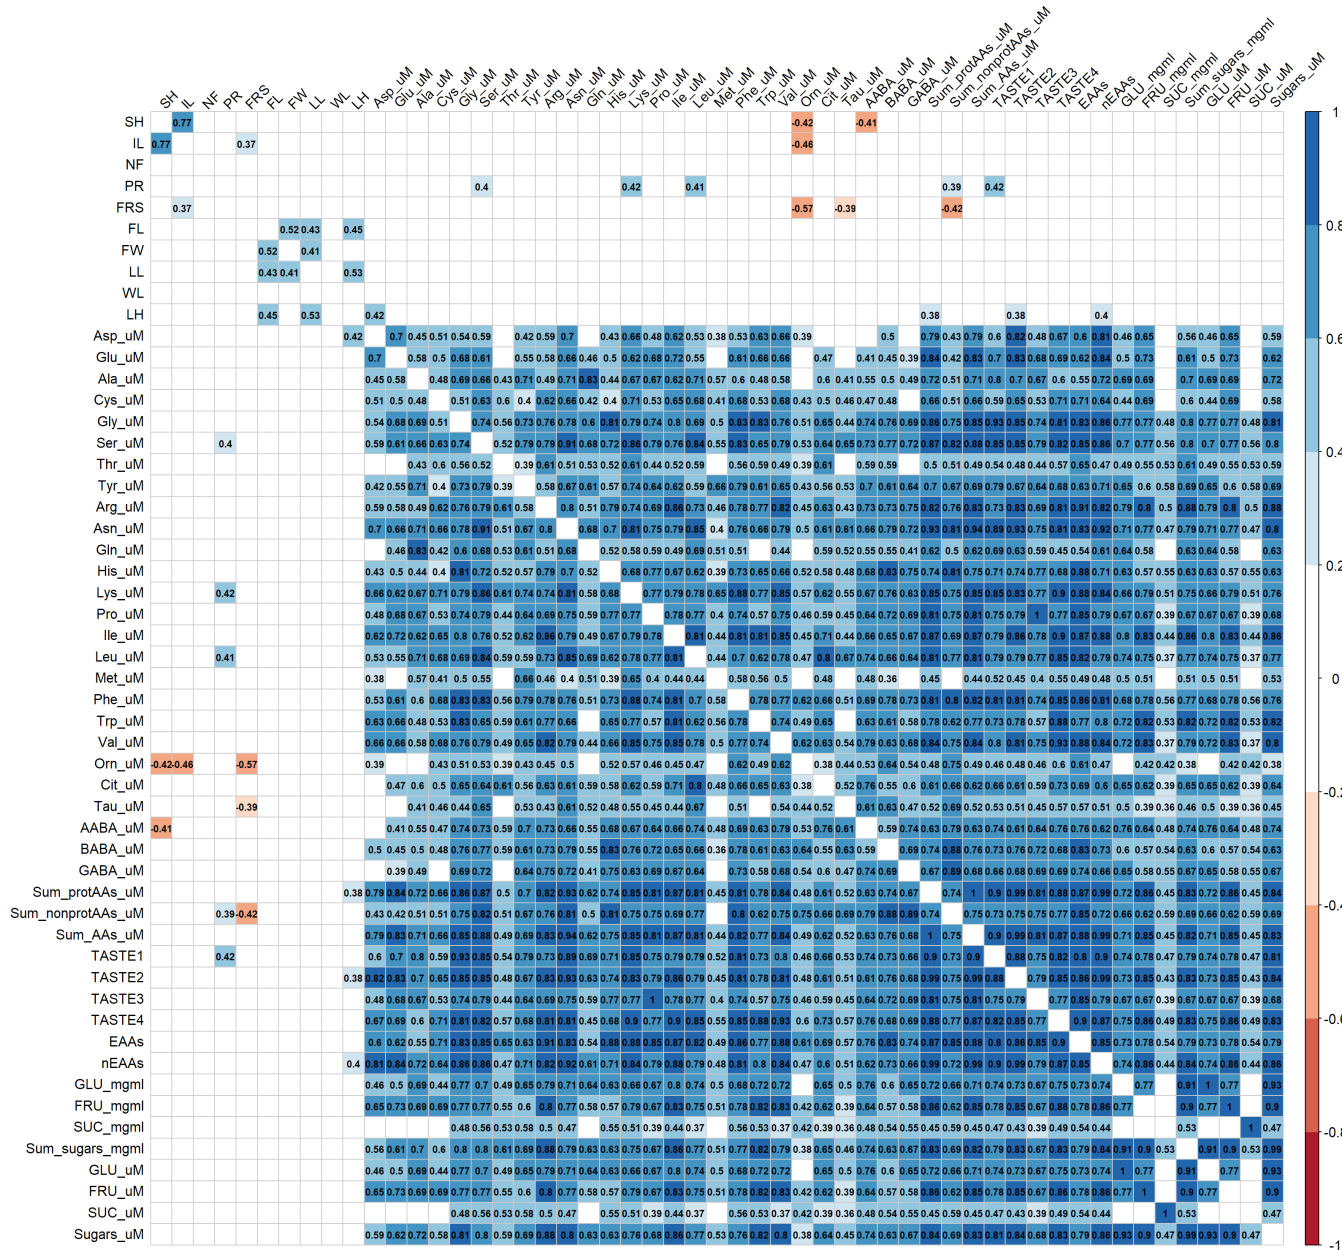

GRU

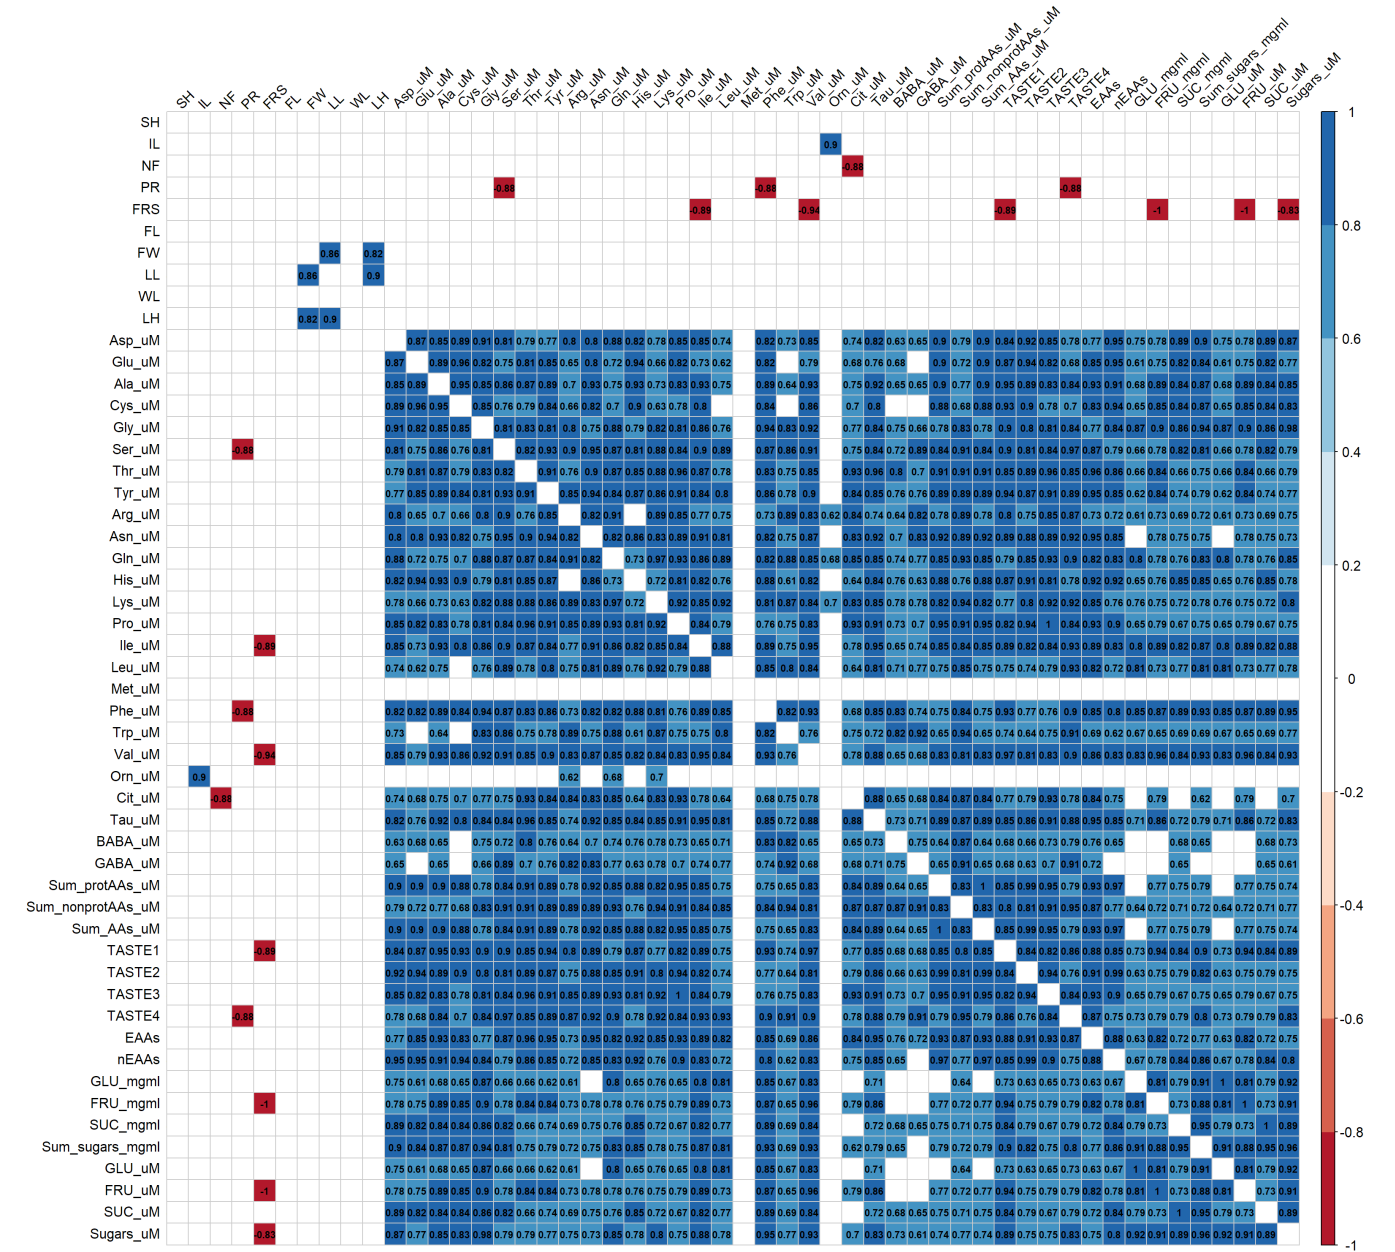

## KRA

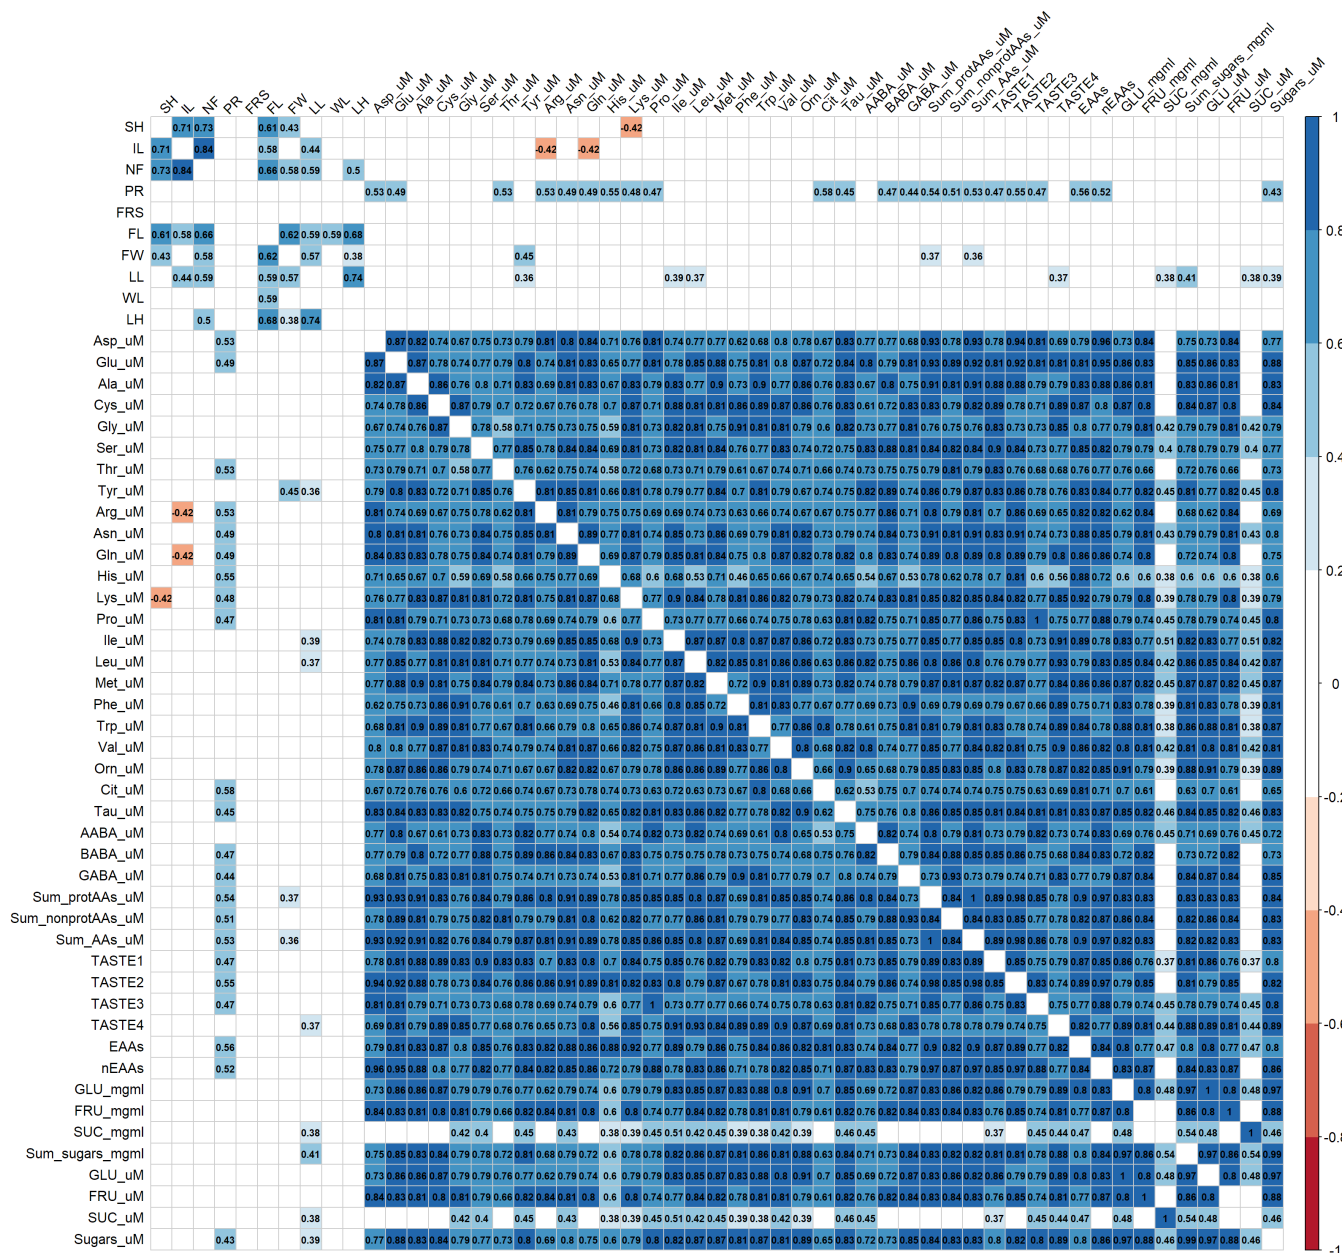



LIP

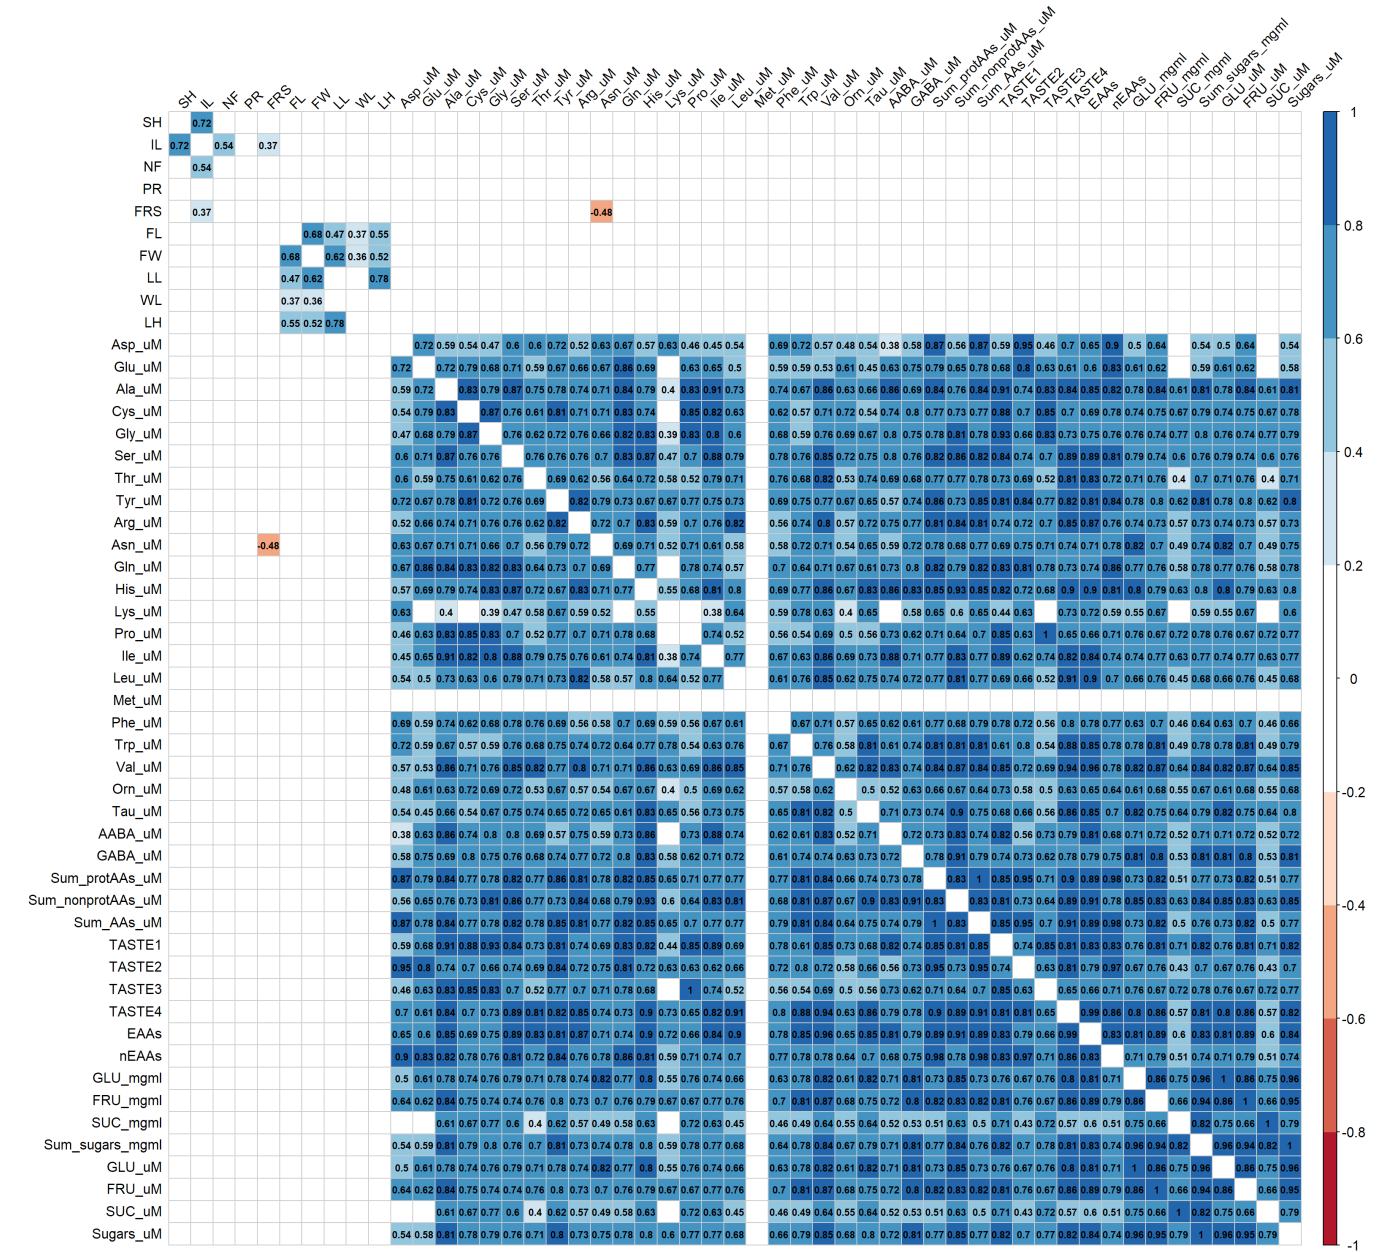

**SOS**

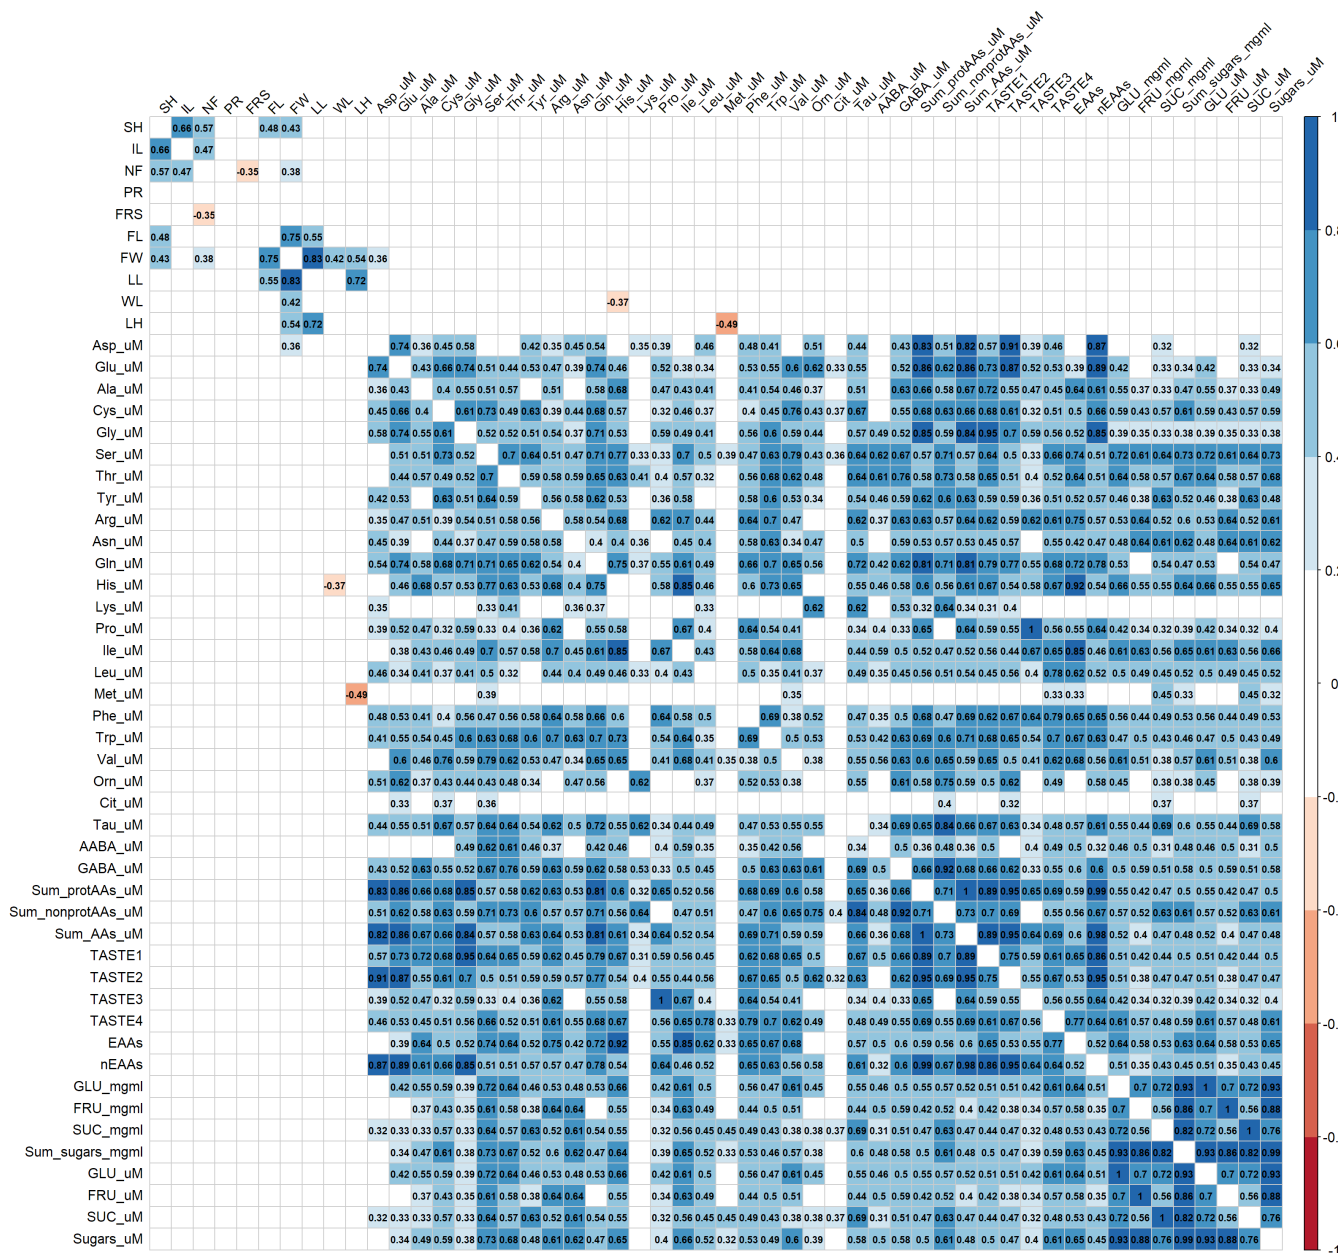



WIG

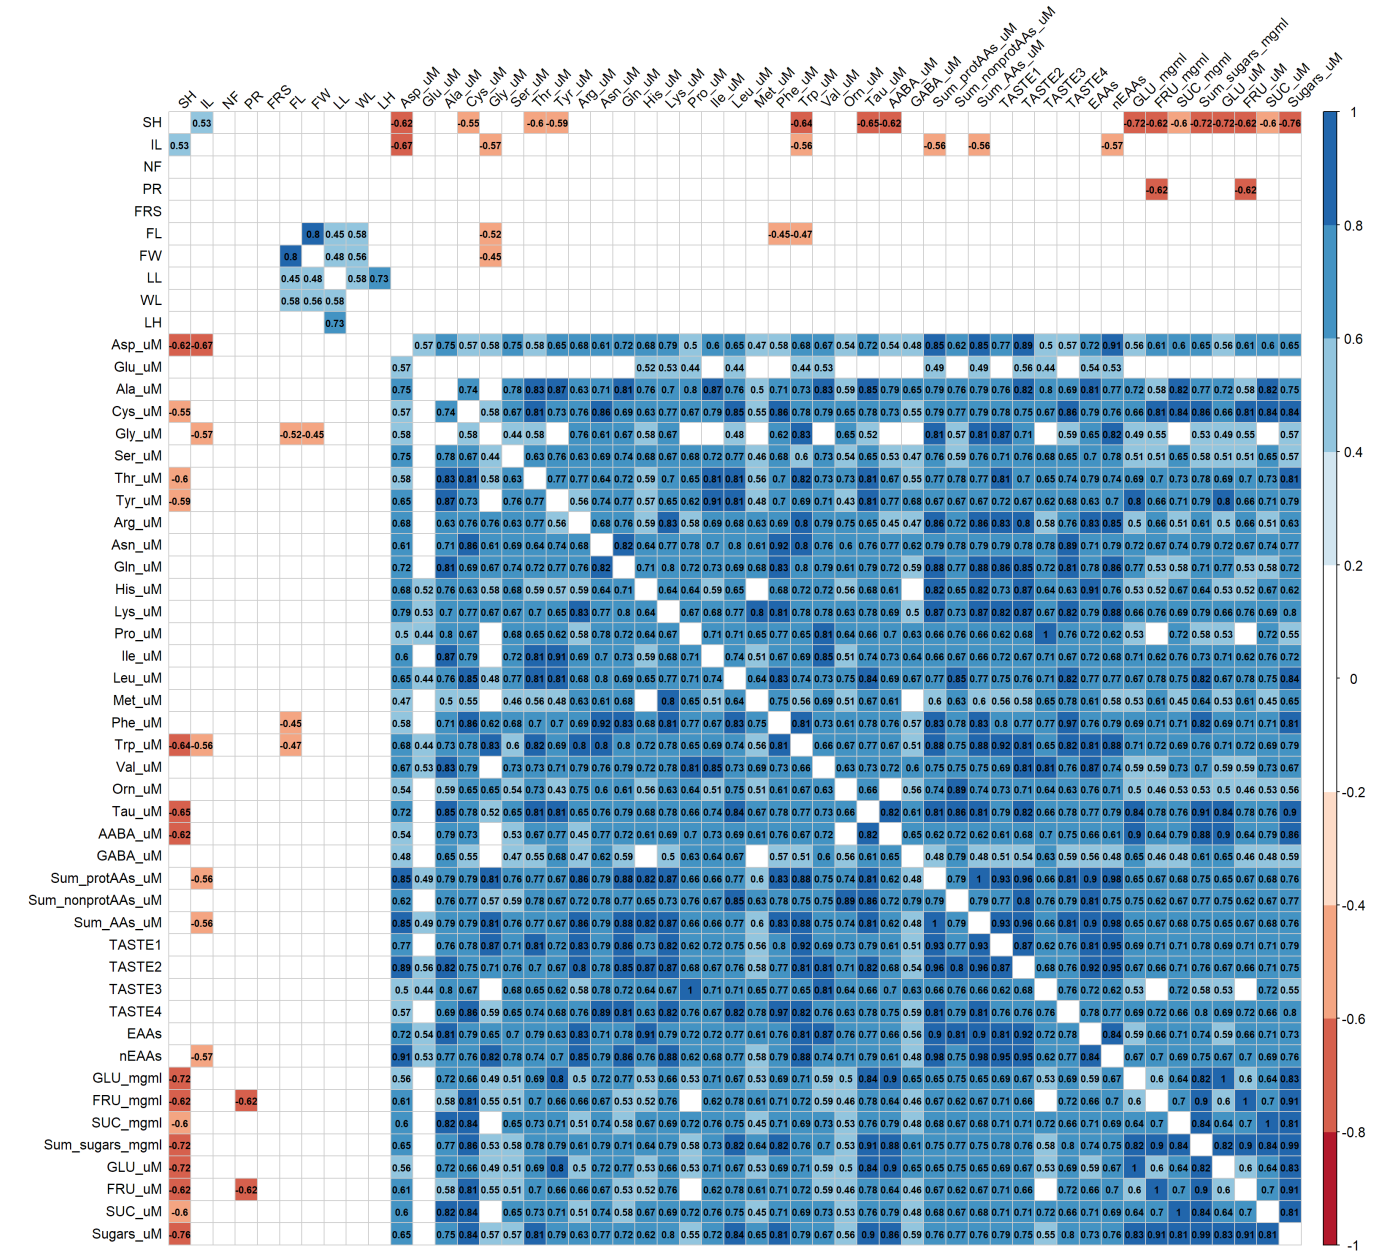

Supplement: s1 [file s1]
